# Supplementary material for: Comparative Efficacy of Thoracoscopic and Conventional Open Rib Fracture Fixation: A Propensity Score-Matched Analysis
Source: Research Square preprint supplement (doi:10.21203/rs.3.rs-8426933/v1), 2026-01-23
Supplement: Supplementary file 1 [file 422ecb42237d39b4a8ac4eee.docx]

Table 1. Patient Characteristics

| Variable | n/ mean±SD | % |
| --- | --- | --- |
| Age (years) | 50.61±10.89 |  |
| Sex |  |  |
| Male | 109 | 77.3 |
| Female | 32 | 22.7 |
| Flail chest |  |  |
| Yes | 26 | 18.4 |
| No | 115 | 81.6 |
| Number of fractured ribs | 6.48±3.25（3-18） |  |
| Number of fracture sites | 9.06±5.43（3-27） |  |
| Mechanism of injury |  |  |
| Motor vehicle accident | 64 | 45.39 |
| Fall from height | 30 | 21.28 |
| Crush injury/heavy object trauma | 17 | 12.06 |
| Bicycle accident | 9 | 6.38 |
| Pedestrian fall | 18 | 12.77 |
| Other | 3 | 2.12 |
| Associated injuries |  |  |
| Pulmonary contusion | 85 | 60.28 |
| Pneumothorax | 18 | 12.77 |
| Hemothorax | 35 | 24.82 |
| Hemopneumothorax | 39 | 27.66 |
| Clavicle fracture | 19 | 13.48 |
| Scapular fracture | 24 | 17.02 |
| Sternal fracture | 5 | 3.55 |
| Extremity fracture | 24 | 17.02 |
| Pelvic fracture | 3 | 2.13 |
| Hepatic or splenic laceration | 12 | 8.51 |
| Renal contusion | 4 | 2.84 |
| Postoperative complications |  |  |
| Lower extremity deep vein thrombosis | 18 | 12.77 |
| Poor wound healing | 7 | 4.96 |
| Pneumonia | 92 | 65.25 |
