# Supplementary material for: Comparative Efficacy of Thoracoscopic and Conventional Open Rib Fracture Fixation: A Propensity Score-Matched Analysis
Source: Research Square preprint supplement (doi:10.21203/rs.3.rs-8426933/v1), 2026-01-23
Supplement: Supplementary file 2 [file 4556f890ad41674ec6b23eaf.docx]

Table 3. Analysis of clinical characteristics before and after PSM between the HG and the CG

|  | Before Matching | | | After Matching | | |
| --- | --- | --- | --- | --- | --- | --- |
| Variable | HG（n=30） mean±SD | CG（n=97） mean±SD | P | HG（n=24） mean±SD | CG（n=24） mean±SD | P |
| Age (years) | 52.57±8.52 | 50.91±11.34 | 0.461 | 52.79±9.48 | 53.17±12.29 | 0.906 |
| Sex |  |  |  |  |  |  |
| Male | 20 | 79 | 0.088 | 18 | 17 | 0.745 |
| Female | 10 | 18 |  | 6 | 7 |  |
| Flail chest |  |  |  |  |  |  |
| Yes | 9 | 15 | 0.076 | 5 | 6 | 0.731 |
| No | 21 | 82 |  | 19 | 18 |  |
| ASA score | 3.07±0.78 | 2.91±0.84 | 0.359 | 2.92±0.78 | 3.21±0.83 | 0.216 |
| TTS score | 11.83±3.90 | 10.63±3.50 | 0.111 | 10.88±3.49 | 12.00±3.65 | 0.281 |
| AIS score |  |  |  |  |  |  |
| Head/Neck | 1.37±1.16 | 1.08±1.02 | 0.198 | 1.21±1.14 | 1.29±1.00 | 0.789 |
| Face | 0.67±0.66 | 0.56±0.56 | 0.369 | 0.58±0.58 | 0.67±0.56 | 0.618 |
| Chest | 3.37±0.56 | 3.28±0.59 | 0.47 | 3.29±0.55 | 3.42±0.58 | 0.449 |
| Abdomen | 1.30±0.75 | 1.11±0.71 | 0.214 | 1.21±0.78 | 1.25±0.74 | 0.850 |
| Extremities | 1.53±0.63 | 1.40±0.73 | 0.377 | 1.58±0.65 | 1.58±0.78 | 1.000 |
| External | 1.70±0.53 | 1.67±0.49 | 0.777 | 1.71±0.55 | 1.71±0.46 | 1.000 |
| ISS score | 20.47±5.80 | 19.22±7.22 | 0.389 | 19.58±6.01 | 21.13±7.07 | 0.420 |
| Operative time（min） | 292.70±127.32 | 200.33±97.67 | **＜0.001** | 275.67±129.61 | 238.83±94.78 | 0.267 |
| Mechanical ventilation duration (days) | 6.93±8.35 | 4.68±7.61 | 0.169 | 6.13±8.17 | 6.75±10.01 | 0.814 |
| Chest tube duration (days) | 10.43±7.44 | 9.09±7.28 | 0.382 | 10.79±8.16 | 12.83±8.22 | 0.392 |
| ICU stay (days) | 10.80±13.16 | 6.42±9.11 | **0.042** | 9.83±13.65 | 9.04±11.61 | 0.830 |
| Intraoperative blood loss (days) | 234.67±180.40 | 192.01±233.91 | 0.361 | 182.92±98.97 | 178.75±220.36 | 0.933 |
| Hospital stay (days) | 19.53±12.72 | 21.26±12.59 | 0.514 | 18.04±11.96 | 26.67±14.61 | **0.030** |
