# Supplementary material for: Comparative Efficacy of Thoracoscopic and Conventional Open Rib Fracture Fixation: A Propensity Score-Matched Analysis
Source: Research Square preprint supplement (doi:10.21203/rs.3.rs-8426933/v1), 2026-01-23
Supplement: Supplementary file 3 [file b273168fa2d20ddf7a9fd39d.docx]

Table 2. Analysis of clinical characteristics before and after PSM between MG and the CG

|  | Before Matching | | | After Matching | | |
| --- | --- | --- | --- | --- | --- | --- |
| Variable | MG（n=44） mean±SD | CG（n=97） mean±SD | P | MG（n=33） mean±SD | CG（n=33） mean±SD | P |
| Age (years) | 49.95±9.91 | 50.91±11.34 | 0.632 | 51.61±8.84 | 52.30±11.34 | 0.782 |
| Sex |  |  |  |  |  |  |
| Male | 30 | 79 | 0.082 | 26 | 25 | 0.769 |
| Female | 14 | 18 |  | 7 | 8 |  |
| Flail chest |  |  |  |  |  |  |
| Yes | 11 | 15 | 0.176 | 8 | 10 | 0.58 |
| No | 33 | 82 |  | 25 | 23 |  |
| ASA score | 2.91±0.77 | 2.91±0.84 | 0.990 | 2.91±0.72 | 2.97±0.81 | 0.749 |
| TTS score | 11.16±3.83 | 10.63±3.50 | 0.420 | 11.21±3.59 | 11.76±3.35 | 0.526 |
| AIS score |  |  |  |  |  |  |
| Head/Neck | 1.43±1.15 | 1.08±1.02 | 0.072 | 1.30±1.13 | 1.48±1.15 | 0.519 |
| Face | 0.68±0.60 | 0.56±0.56 | 0.231 | 0.67±0.60 | 0.70±0.64 | 0.842 |
| Chest | 3.25±0.61 | 3.28±0.59 | 0.795 | 3.30±0.59 | 3.39±0.56 | 0.52 |
| Abdomen | 1.20±0.63 | 0.11±0.71 | 0.464 | 1.21±0.65 | 1.30±0.59 | 0.553 |
| Extremities | 1.45±0.59 | 1.40±0.73 | 0.676 | 1.52±0.62 | 1.55±0.83 | 0.867 |
| External | 1.72±0.50 | 1.67±0.49 | 0.527 | 1.73±0.52 | 1.70±0.52 | 0.803 |
| ISS score | 19.50±6.40 | 19.22±7.22 | 0.823 | 19.70±6.06 | 21.58±762 | 0.272 |
| Operative time（min） | 276.93±122.68 | 200.33±97.67 | **＜0.001** | 284.73±123.83 | 214.70±111.56 | **0.019** |
| Mechanical ventilation duration (days) | 5.57±7.55 | 4.68±7.61 | 0.521 | 5.45±7.57 | 7.39±10.38 | 0.389 |
| Chest tube duration (days) | 9.50±7.63 | 9.09±7.28 | 0.762 | 9.64±7.50 | 11.30±8.24 | 0.393 |
| ICU stay (days) | 9.75±12.50 | 6.42±9.11 | 0.077 | 8.79±12.16 | 9.76±11.85 | 0.744 |
| Intraoperative blood loss (days) | 209.55±170.43 | 192.01±233.91 | 0.656 | 204.24±180.97 | 176.06±170.44 | 0.517 |
| Hospital stay (days) | 18.64±11.56 | 21.26±12.59 | 0.242 | 18.42±11.19 | 25.36±15.46 | **0.041** |
